# Supplementary material for: Molecular dynamics simulation and experimental verification of the effects of vinyl silicone oil viscosity on the mechanical properties of silicone rubber foam
Source: Royal Society of Chemistry journal article supplement (doi:10.1039/d4ra04784b), 2024-01-01
Supplement: d4ra04784b1.pdf [file d4ra04784b1.pdf]

## Supporting Information

### **Molecular dynamics simulation and experimental verification of the effects of vinyl silicone oil viscosity on the mechanical properties of silicone rubber foam**

Hongyu He<sup>a,b</sup>, Lulu Li<sup>a</sup>, Ruhan Ya<sup>c</sup>, Hong Liu<sup>d</sup>, Bin Luo<sup>d</sup>, Zhipeng Li<sup>b\*</sup>, Wenhui Tian<sup>b\*</sup>

(a. School of Materials Science and Engineering, University of Science and Technology Beijing, Beijing 100083, China; hehongyu666@126.com(H.He); 15733153822@163.com(L.Li)

b. School of Materials Science and Engineering, Shunde Innovation School, University of Science and Technology Beijing, Foshan 528300, China;

c. Inner Mongolia Academy of Science and Technology, Huhhot 010020, China; YARUHANJIAN@163.com(R.Ya)

d. Guangdong homeen organic silicon material Co., Ltd., Zhaoqing 526072, China; roben@hm-sil.com(B.Luo); liuhong@homeen.cn(H.Liu);

\*Correspondence: zplmse@ustb.edu.cn (Z.Li); wenhuaitian@ustb.edu.cn (W.Tian)

## Experimental section

### Cellular Structure

We placed the foam samples in liquid nitrogen for approximately 30 min to freeze and fracture, and then obtained the fractured surface sample. The fractured surfaces of the foamed samples were coated with gold. Under an accelerated voltage of 5 kV, the cellular structure was observed through a ZEISS GeminiSEM 500 (Oberkochen, Germany) scanning electron microscope (SEM). Cell diameter was measured using Image-Pro Plus 6.0. The sum of all cell diameters was divided by the number of cells (at least 100 cells) in the SEM images to determine the average cell size ( $\Phi$ ). The cell density ( $N_f$ ) of foamed samples was determined as follows [1, 2]:

$$N_f = \left( \frac{nM^2}{A} \right)^{\frac{3}{2}} \quad (1)$$

where  $N_f$  is the cell density,  $n$  is the number of cells,  $M$  is the magnification, and  $A$  is the area of microscopic image ( $\text{cm}^2$ ), which was calculated using Image-Pro Plus 6.0 software.

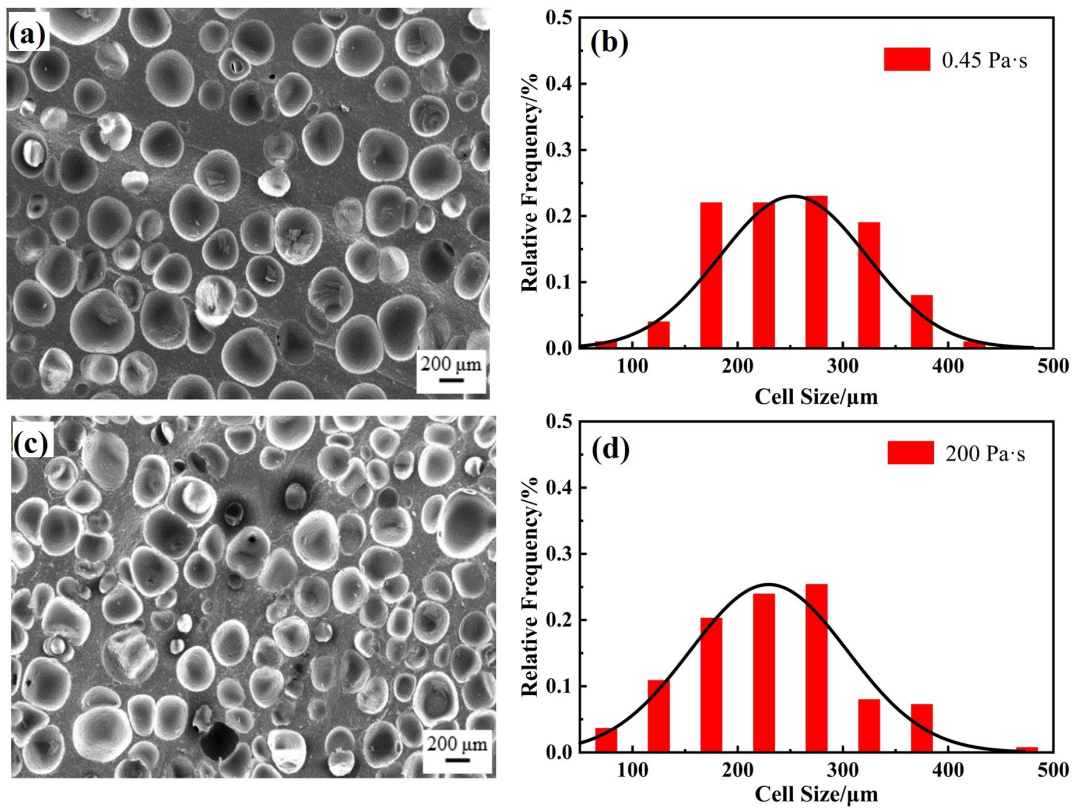

**Fig. S1.** Effect of crosslinking agent content on cellular structure and cell distribution of silicone rubber foam

**Table S1.** Effect of vinyl silicone oil viscosity on the cellular structure of the SRF.

| <b>Cellular Structures</b>                  | <b>0.45 Pa·s</b>   | <b>200 Pa·s</b>    |
|---------------------------------------------|--------------------|--------------------|
| Cell average size ( $\mu\text{m}$ )         | 253                | 229                |
| Cell density ( $\text{cells}/\text{cm}^3$ ) | $1.55 \times 10^9$ | $2.52 \times 10^9$ |
| Foaming density ( $\text{g}/\text{cm}^3$ )  | 0.658              | 0.515              |
| Porosity (%)                                | 54                 | 64                 |

## References

- [1] Y.L. Jia, B. Xiang, W.H. Zhang, T. Liu, S.K. Luo. Microstructure and properties of microcellular silicone rubber foams with improved surface quality. *Polymer. Journal*, 52(2019)207–216.
- [2] W.Y. Tang, X. Liao, Y. Zhang, J.S. Li, G. Wang, G.X. Li. Mechanical-microstructure relationship and cellular failure mechanism of silicone rubber foam by the cell microstructure designed in supercritical CO<sub>2</sub>. *Journal of Physical Chemistry C*, 123(2019)26947–26956.
